# Supplementary material
Source: PubMed Central journal article supplement (PMC6276646)
Supplement: hoy008suppl_data1.pdf [file hoy008suppl_data1.pdf]

---

## Supplementary Data I. Questionnaire

### Genetic modification

In the future, genetic modification may offer people new possibilities. Imagine that human genetic modification would already be possible and available to you. What would you do in the following scenarios?

#### Scenario 1:

You are gluten intolerant. Would you want to eat gluten-free wheat that was made through genetic modification?

- Yes  
 No

You would/would not eat gluten-free wheat that was made through genetic modification. Could you explain why?

---

---

#### Scenario 2:

You have a severe neuromuscular disease because of which you are likely to end up in a wheelchair. Would you want to genetically modify yourself to prevent this?

- Yes  
 No

You would/would not want use genetic modification on yourself to cure your disease. Could you explain why?

---

---

#### Scenario 3:

You have a heritable severe neuromuscular disease and you want to have a child. Would you want to genetically modify your embryo so that your child will not have this disease?

- Yes  
 No

You would/would not want to genetically modify your embryo to prevent a neuromuscular disease. Could you explain why?

---

---

#### Scenario 4:

You are healthy and you want to have a child. Would you want to genetically modify your embryo so that your child will be resistant to HIV?

- Yes  
 No

You would/would not want to genetically modify your embryo to make it resistant to HIV. Could you explain why?

---

---

#### Scenario 5:

You are healthy and you want to have a child. Would you want to genetically modify your embryo so that your child will be more intelligent?

- Yes  
 No

You would/would not want to genetically modify your embryo to make it more intelligent. Could you explain why?

---

---

What is your gender?

- Man  
 Woman

How old are you?

\_\_\_ years

Have you seen the documentary from *De Kennis van Nu* about genetic modification (e.g. on March 31)?

- Yes  
 No
