# Supplementary material
Source: PubMed Central journal article supplement (PMC6276646)
Supplement: hoy008suppl_data2.pdf [file hoy008suppl_data2.pdf]

---

## Supplementary Data 2. Announcement of documentary and study

### REVOLUTION IN GENETIC TECHNOLOGY

#### Scientists want to know what you think!

Special

A new, easy-to-use gene editing technique named CRISPR/Cas9 holds the promise of curing heritable diseases with large accuracy. However, this technology may also lead the way towards designer baby's, genetic enhancement and a new generation of modified foods. Diederik and Elisabeth look into what CRISPR may be able to alter in themselves and in their foods.

Diederik and Elisabeth are visiting Jan Schaart who works at the University of Wageningen on, amongst others, gluten-free wheats, which may be used to bake gluten-free bread. They ask scientists Niels Geijsen of the Hubrecht Institute about the possibilities of the technique to cure two generations of patients with the heritable muscular disorder FSHD. Could this new technology limit the progression of their disease? And could it prevent the disease in their offspring?

The possibilities of CRISPR/Cas9 are so extensive, scientists called for a moratorium against modifying DNA of human embryo's half a year ago. However, scientists are saying they also don't quite know how to move forward. They want citizens to have a say in what the appropriate boundaries are.

Retrieved and translated from: <https://www.dekennisvanu.nl/site/special/Revolutie-in-de-gentechnologie/42#!/>
