# Supplementary material
Source: PubMed Central journal article supplement (PMC6276646)
Supplement: hoy008suppl_tabl1.pdf [file hoy008suppl_tabl1.pdf]

**Supplementary Table S1** Reasons provided in favour and against using genome modification.

| Domain                                       | Reasons provided (n = x)*                                                                                                               |                                                                                               |                                                                                                                                                  |
|----------------------------------------------|-----------------------------------------------------------------------------------------------------------------------------------------|-----------------------------------------------------------------------------------------------|--------------------------------------------------------------------------------------------------------------------------------------------------|
|                                              | In favour                                                                                                                               | Conditions                                                                                    | Against                                                                                                                                          |
| Safety of the individuals concerned          | GM would not pose health risks (n = 77)                                                                                                 | I would only use GM if it would not pose unacceptable health risks (n = 275)                  | GM would pose unacceptable health risks (n = 239)                                                                                                |
|                                              | GM would pose limited health risks but those are acceptable considering the benefits (n = 65)                                           |                                                                                               | GM would impose a high treatment burden (n = 6)                                                                                                  |
| Effectiveness                                | GM would not impose a high treatment burden (n = 3) <sup>1</sup>                                                                        | I would only use GM if it would not impose a high treatment burden (n = 8)                    | GM would not be an effective treatment (n = 61)                                                                                                  |
|                                              | GM would be an effective treatment (n = 21)                                                                                             | I would only use GM if it would be an effective treatment (n = 16)                            | GM would not allow for me to become a full genetic parent since modified genes are passed on (n = 10) <sup>6,7</sup>                             |
|                                              | GM would be more effective if applied in the germline than in somatic cell lines (n = 3)                                                |                                                                                               | GM would not cure the cause of the problem but merely its expression (n = 20) <sup>7</sup>                                                       |
|                                              | GM would cure the cause of the problem (n = 5) <sup>1</sup>                                                                             |                                                                                               |                                                                                                                                                  |
|                                              | GM would be acceptable because the goals justifies the means (n = 3)                                                                    |                                                                                               |                                                                                                                                                  |
| Quality of life of the individuals concerned | GM would prevent the disease, which is preferable over curing the disease (n = 29) <sup>7</sup>                                         |                                                                                               | GM prevents the disease, and this is not preferable over curing the disease if it manifests (n = 45) <sup>6</sup>                                |
|                                              | GM would improve my/my child's quality of life (n = 1505)                                                                               | I would only use GM if it would improve my/my child's quality of life (n = 114)               | GM would not (sufficiently) improve my/my child's quality of life (n = 256)                                                                      |
|                                              |                                                                                                                                         |                                                                                               | GM would make my child too different from me to properly support the child (n = 9) <sup>2,6</sup>                                                |
|                                              |                                                                                                                                         |                                                                                               | GM would eliminate some of the joys of parenthood (n = 4) <sup>2,6,7</sup>                                                                       |
|                                              | GM would prevent disease's suffering in upcoming generations (n = 26)                                                                   |                                                                                               |                                                                                                                                                  |
|                                              | GM would provide my progeny with an evolutionary advantage (n = 3) <sup>6</sup>                                                         |                                                                                               |                                                                                                                                                  |
|                                              | GM would improve the quality of life of the family and friends of the cured individual (n = 47)                                         |                                                                                               |                                                                                                                                                  |
|                                              | GM would allow more people to have the positive attributes I have, which would make connections more enjoyable (n = 1) <sup>2,6,7</sup> |                                                                                               | GM would allow more people to have the positive attributes I have, which would make it less special for me to have them (n = 3) <sup>2,6,7</sup> |
|                                              | GM would prevent social exclusion because having a disease is not accepted in society (n = 1) <sup>1,7</sup>                            | I would only use GM if it was accepted in society (n = 4) <sup>6</sup>                        | GM would cause social exclusion because being genetically modified is not accepted in society (n = 3)                                            |
|                                              |                                                                                                                                         |                                                                                               |                                                                                                                                                  |
| Existence of a clinical need or alternative  | GM would prevent a disease of which the risk of acquiring is high (n = 3) <sup>6</sup>                                                  | I would only use GM if the risk of acquiring the disease is high (n = 29) <sup>6</sup>        | GM would not be necessary as the risk of acquiring the disease is low (n = 137)                                                                  |
|                                              | GM is better than, or an acceptable alternative to, current options (n = 72)                                                            | I would only use GM if there are no alternatives available to obtain the same result (n = 30) | GM would not be acceptable as there are alternatives available to obtain the same result (n = 585)                                               |
|                                              | GM would be preferable to terminating a pregnancy (n = 8) <sup>6</sup>                                                                  |                                                                                               | GM would be less acceptable than terminating a pregnancy (n = 17) <sup>5,6</sup>                                                                 |

Continued

**Supplementary Table SI** *Continued*

| Domain                      | Reasons provided (n = x)*                                                                                                   |                                                                                                                                                                                              |                                                                                                                                                                                                                                                                                                                                                   |
|-----------------------------|-----------------------------------------------------------------------------------------------------------------------------|----------------------------------------------------------------------------------------------------------------------------------------------------------------------------------------------|---------------------------------------------------------------------------------------------------------------------------------------------------------------------------------------------------------------------------------------------------------------------------------------------------------------------------------------------------|
|                             | In favour                                                                                                                   | Conditions                                                                                                                                                                                   | Against                                                                                                                                                                                                                                                                                                                                           |
| Biodiversity and ecosystems | GM would not be inherently different than currently accepted vaccines and medications (n = 102)                             | I would only find GM acceptable if it would be applied for disease rather than enhancement (n = 170)                                                                                         | GM would reduce the willingness to adopt as couples with a genetic predisposition would be able to have healthy child of their own (n = 3) <sup>5,6,7</sup><br>GM would reduce human diversity which is important for the functioning of society (n = 98) <sup>6</sup><br>GM would be unacceptable because disease has a purpose in life (n = 42) |
|                             | GM would be acceptable because disease does not have a purpose in life (n = 4) <sup>6</sup>                                 | I would only use GM if it would not affect biodiversity (n = 7) <sup>4</sup>                                                                                                                 | GM would reduce biodiversity (n = 15)                                                                                                                                                                                                                                                                                                             |
|                             | GM would not affect biodiversity (n = 4)                                                                                    | I would only use GM if it would not do ecological harm (n = 15) <sup>4</sup>                                                                                                                 | GM would cause harm to ecosystems (n = 18) <sup>4</sup>                                                                                                                                                                                                                                                                                           |
|                             | GM would protect ecosystems (n = 6)<br>GM would be better for the ecosystem than current alternatives (n = 23) <sup>7</sup> |                                                                                                                                                                                              |                                                                                                                                                                                                                                                                                                                                                   |
| Animal homo sapiens         | GM would reduce the frequency of or eradicate diseases (n = 63)                                                             | I would only use GM if there was no alternative to eradicate the disease (n = 2) <sup>3,6</sup>                                                                                              | GM would not eradicate the disease (n = 4) <sup>3,6</sup><br>GM would not be effective as other diseases will replace the eradicated ones (n = 10) <sup>7</sup>                                                                                                                                                                                   |
|                             | GM would allow its users to contribute more to society (n = 65)                                                             |                                                                                                                                                                                              | GM would not (sufficiently) allow its users to contribute more to society (n = 92) <sup>6,7</sup>                                                                                                                                                                                                                                                 |
|                             | GM would improve mankind's chance of survival (n = 7)                                                                       | I would only use GM if long-term consequences for society are known (n = 1) <sup>3,6</sup>                                                                                                   | GM would have negative long-term consequences for society (n = 211)                                                                                                                                                                                                                                                                               |
|                             | GM would contribute to progress through science (n = 5) <sup>1</sup>                                                        | I would only use GM if follow-up is in place to monitor long-term consequences for society (n = 2)<br>I would only use GM if less children will be born (n = 1) <sup>3,6</sup>               |                                                                                                                                                                                                                                                                                                                                                   |
| Human life and dignity      | GM [of the germline] would not affect a human because the embryo does not yet have that status (n = 1) <sup>5,6</sup>       |                                                                                                                                                                                              | GM would add to the global overpopulation (n = 9) <sup>7</sup><br>GM [of the germline] would not do justice to the moral status of the embryo (n = 1) <sup>5,6</sup>                                                                                                                                                                              |
|                             | GM would not change someone's identify (n = 1) <sup>5,6</sup>                                                               |                                                                                                                                                                                              | GM would be unnecessary as I would accept my child however it is born (n = 47) <sup>6</sup><br>GM would change someone's identity (n = 20)                                                                                                                                                                                                        |
|                             | GM incites the 'wow factor' and/or does not incite the 'yuck-factor' (n = 206)                                              | I would only use GM if ethical issues were addressed (n = 2)                                                                                                                                 | GM incites the 'yuck-factor' (i.e. a feeling of horror, revulsion, or disgust) (n = 262)                                                                                                                                                                                                                                                          |
| Trust in regulation         | GM would not be offered unless it was established as being a good treatment (n = 32) <sup>7</sup>                           | I would only use GM if it would be well-regulated (n = 4)                                                                                                                                    | GM would be subject to special interests (commercial, regimes, terrorist), which may cause exploitation of vulnerable individuals (n = 27)                                                                                                                                                                                                        |
| Justice                     | GM would improve equality as everyone would have access to beneficial genetic traits (n = 2) <sup>5,6</sup>                 | I would only use GM if not using it would make me fall behind (n = 23) <sup>6</sup>                                                                                                          | GM would allow individuals unfair access to beneficial traits (n = 6) <sup>6,7</sup><br>GM would incite a rate race (n = 14) <sup>2,6</sup>                                                                                                                                                                                                       |
|                             | GM would not have much effect as it would merely shift the normal curve to a higher average (n = 15) <sup>2,6,7</sup>       | I would only use GM if everyone would apply modification and thus no segregation would occur (n = 3) <sup>2,6,7</sup><br>I would only use GM if it would be accessible for everyone (n = 14) | GM would increase segregation (n = 50)                                                                                                                                                                                                                                                                                                            |

*Continued*

**Supplementary Table SI** *Continued*

| Domain                     | Reasons provided ( <i>n</i> = <i>x</i> )*                                                                                                                                                                                                                                                          |                                                                                                                                                                     |                                                                                                                                                                                                                                                                                 |
|----------------------------|----------------------------------------------------------------------------------------------------------------------------------------------------------------------------------------------------------------------------------------------------------------------------------------------------|---------------------------------------------------------------------------------------------------------------------------------------------------------------------|---------------------------------------------------------------------------------------------------------------------------------------------------------------------------------------------------------------------------------------------------------------------------------|
|                            | In favour                                                                                                                                                                                                                                                                                          | Conditions                                                                                                                                                          | Against                                                                                                                                                                                                                                                                         |
|                            |                                                                                                                                                                                                                                                                                                    | I would only use GM if not modifying would also remain acceptable ( <i>n</i> = 9)                                                                                   | GM would lower acceptability of imperfections in society ( <i>n</i> = 32)<br>GM would reduce incentives to research other treatments for these diseases ( <i>n</i> = 1) <sup>3,6,7</sup><br>GM would require resources for research better spend on other goals ( <i>n</i> = 4) |
| Costs                      | GM would be acceptable as the costs for the individual of living with a disease are high ( <i>n</i> = 11)<br>GM would lower healthcare costs ( <i>n</i> = 52)                                                                                                                                      | I would only use GM if costs of GM are not high for the individual ( <i>n</i> = 9)<br>I would only use GM if it would not increase healthcare costs ( <i>n</i> = 8) | GM would not be acceptable as the costs of GM are high for the individual ( <i>n</i> = 10)<br>GM would increase healthcare costs ( <i>n</i> = 6)<br>GM would reduce healthcare needs and thereby cut revenues in healthcare ( <i>n</i> = 2) <sup>6,7</sup>                      |
| Slippery slope             | GM would strictly be applied to those purposes considered acceptable ( <i>n</i> = 6)                                                                                                                                                                                                               | I would only use GM if it would not change societal norms and induce a slippery slope effect ( <i>n</i> = 3)                                                        | GM would start a slippery slope towards morally unacceptable applications ( <i>n</i> = 119)                                                                                                                                                                                     |
| Argument of nature         | GM would merely raise the speed and efficiency of a naturally occurring process ( <i>n</i> = 93)<br>GM would not be inherently worse than nature ( <i>n</i> = 4)<br>GM would make use of the most modern technologies ( <i>n</i> = 10)                                                             | I would only use GM if the extent of the manipulation is limited ( <i>n</i> = 14)                                                                                   | GM would medicalize reproduction ( <i>n</i> = 3) <sup>6</sup><br>GM would be too unnatural ( <i>n</i> = 152)<br>GM would make individuals more dependent on technology ( <i>n</i> = 1) <sup>4</sup>                                                                             |
| Parental rights and duties | GM is a moral obligation as I do not have the right to withhold my child from the possibilities created by germline modification ( <i>n</i> = 63) <sup>6</sup><br>GM is acceptable as I do have the right to decide on modifying genes on behalf of my unborn child ( <i>n</i> = 1) <sup>5,6</sup> |                                                                                                                                                                     | GM is unacceptable as I do not have the right to decide on modifying genes on behalf of my unborn child ( <i>n</i> = 56) <sup>6</sup>                                                                                                                                           |
| (Reproductive) autonomy    | GM would be acceptable, because there is no authority that could decide it is not ( <i>n</i> = 1) <sup>5,6</sup><br>GM would fall under my right for autonomy and thus should not be prohibited ( <i>n</i> = 29)<br>GM would have consequences that are limited to myself ( <i>n</i> = 32)         | I would only use GM if it remains a free choice to do so ( <i>n</i> = 11)<br>I would only use GM if potential consequences are limited to myself ( <i>n</i> = 24)   | GM would not be acceptable, there is no authority to decide that it is ( <i>n</i> = 4) <sup>6,7</sup><br>GM would create choices and thereby responsibilities that people are not able to carry out ( <i>n</i> = 1) <sup>5,6,7</sup>                                            |

GM = genome modification.

\*Number of times an argument was spontaneously mentioned in relation to one of the five scenarios.

<sup>1</sup>This argument was only referred to as a response to the scenario: 'I would cure own neuromuscular disease to prevent ending up in a wheelchair'.

<sup>2</sup>This argument was only referred to as a response to the scenario: 'I would increase the intelligence of my embryo'.

<sup>3</sup>This argument was only referred to as a response to the scenario: 'I would introduce resistance to HIV in my embryo'.

<sup>4</sup>This argument was only referred to as a response to the scenario: 'I would eat modified wheat if I would be gluten intolerant'.

<sup>5</sup>This argument was only referred to as a response to the scenario: 'I would modify my embryo to prevent passing on a severe neuromuscular disease'.

<sup>6</sup>This argument was only referred to as a response to the scenarios describing germline modification.

<sup>7</sup>This argument for or against germline GM was not identified in a recent systematic overview of the literature (van Dijke et al., 2017).
